# Supplementary material
Source: PubMed Central journal article supplement (PMC5299071)
Supplement: NIHMS812533-supplement-Appendix_Table_1.pdf [file NIHMS812533-supplement-Appendix_Table_1.pdf]

**Appendix Table 1. Neuropsychological Tests in SAGES Telephone Battery**

| Telephone Test                         | Estimated Administration Time (min) | Maximum Score                                                            | Cognitive Domain(s) Tested                          | Identical to In-Person Test? |
|----------------------------------------|-------------------------------------|--------------------------------------------------------------------------|-----------------------------------------------------|------------------------------|
| Hopkins Verbal Learning Test - Revised | 5-7 (+ 25 min delay)                | Total Recall: #/36<br>Delayed Recall: #/12<br>Discrimination Index: #/12 | Attention, Verbal<br>Episodic Memory                | Yes                          |
| Digit Span (Forwards and Backwards)    | 3-6                                 | Forward : #/16<br>Backward: #/14                                         | Attention, Short-term memory                        | Yes                          |
| Phonemic Fluency                       | 4                                   | Number of unique words in 1 minute                                       | Executive function,<br>Semantic memory,<br>Language | Yes                          |
| Category Fluency                       | 2                                   | Number of unique words in 1 minute                                       | Executive function,<br>Semantic memory,<br>Language | Yes                          |
| Boston Naming Test                     | 3-5                                 | #/15                                                                     | Confrontation naming, Language                      | No – Adapted                 |
